# Supplementary material
Source: publisher site journal article supplement (https://www.dovepress.com/article/401914)
Supplement: Supplementary file 1 [file get_supplementary_file.php]

**Occupational risk factors for physical and mental health in primary healthcare providers: a national cross-sectional survey from 62 urban communities in China**

Supplementary materials

**Table S1**. The roles primary healthcare providers played in the COVID-19 prevention and control

|  | Pre-screening triage | | COVID test | | Service for quarantined patients | | Fever Clinic | | Epidemiological interview | | Other service | |
| --- | --- | --- | --- | --- | --- | --- | --- | --- | --- | --- | --- | --- |
|  | n | % | n | % | n | % | n | % | n | % | n | % |
| **Overall** | 2857 | 58.29 | 2954 | 60.27 | 1297 | 26.46 | 548 | 11.18 | 1001 | 20.42 | 433 | 8.83 |
| Doctors | 905 | 64.14 | 912 | 64.64 | 448 | 31.75 | 233 | 16.51 | 380 | 26.93 | 98 | 22.63 |
| Nurses | 1173 | 67.03 | 1253 | 71.60 | 579 | 33.09 | 201 | 11.49 | 392 | 22.40 | 77 | 17.78 |
| Other professionals | 779 | 44.77 | 789 | 45.34 | 270 | 15.52 | 114 | 6.55 | 229 | 13.16 | 258 | 14.83 |
| Without professional title | 436 | 46.98 | 391 | 42.13 | 144 | 15.52 | 61 | 6.57 | 116 | 12.50 | 119 | 12.82 |
| Senior professional title | 1336 | 59.78 | 1434 | 64.16 | 639 | 28.59 | 260 | 11.63 | 454 | 20.31 | 172 | 7.70 |
| Intermediate professional title | 913 | 63.27 | 948 | 65.70 | 417 | 28.90 | 196 | 13.58 | 356 | 24.67 | 113 | 7.83 |
| Junior professional title | 172 | 58.31 | 181 | 61.36 | 97 | 32.88 | 31 | 10.51 | 75 | 25.42 | 29 | 9.83 |
| Work for less than 5 years | 641 | 58.71 | 634 | 57.53 | 270 | 24.50 | 109 | 9.89 | 208 | 18.87 | 86 | 7.80 |
| Work for 5 to 9 years | 609 | 58.28 | 717 | 68.61 | 283 | 27.08 | 135 | 12.92 | 222 | 21.24 | 79 | 7.56 |
| Work for 10 years or longer | 1601 | 58.15 | 1603 | 58.23 | 744 | 27.03 | 304 | 11.04 | 571 | 20.74 | 268 | 9.73 |


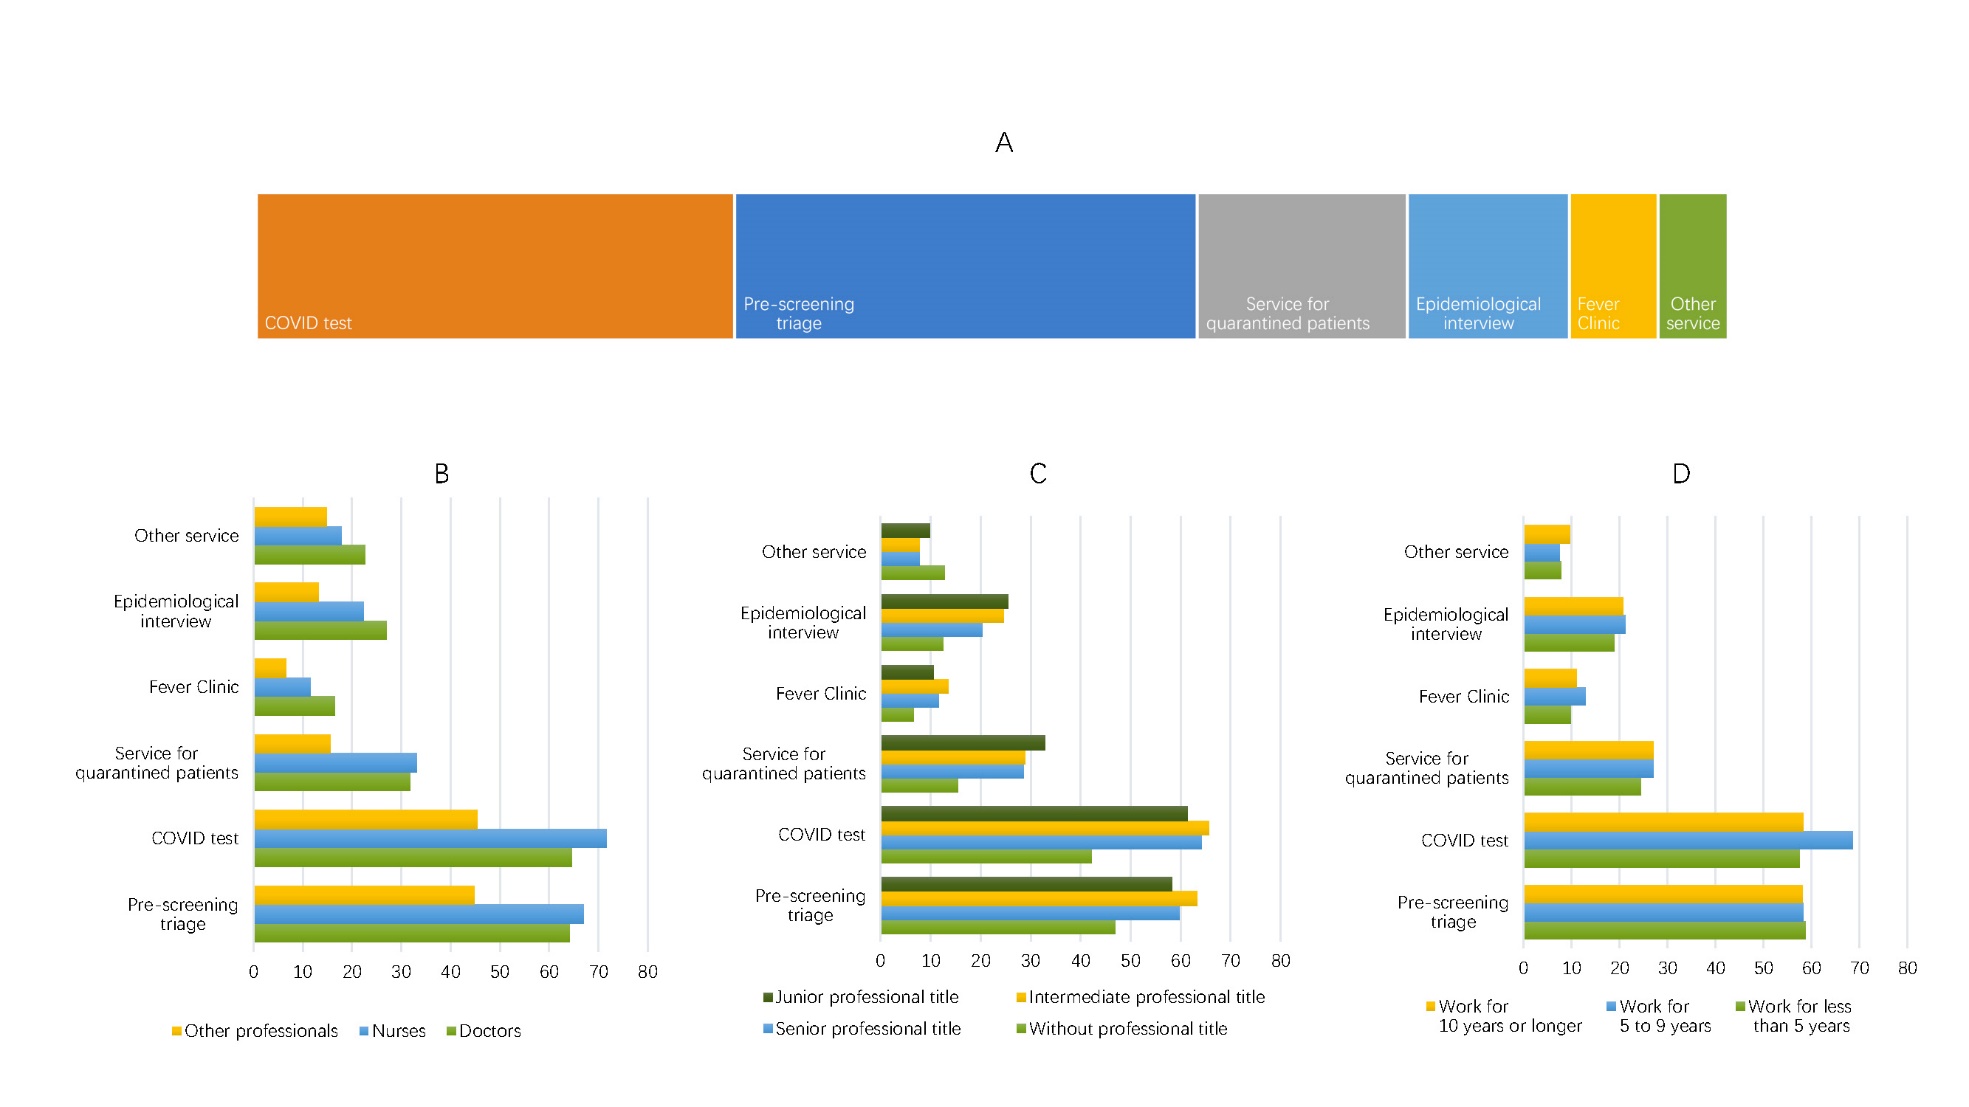
**Figure S1** The roles primary healthcare providers played in the COVID-19 prevention and control. A: The overall proportions of the study populations who took charge of COVID-19 related work; B: Proportions of COVID-19 related work stratified by professional expertise; C: Proportions of COVID-19 related work stratified by professional levels; D: Proportions of COVID-19 related work stratified by work years.
